# Supplementary material for: Free Amino Acids and Volatile Aroma Compounds in Watermelon Rind, Flesh, and Three Rind-Flesh Juices
Source: MDPI journal article supplement (doi:10.3390/molecules27082536), 2022-04-14
Supplement: s1 [file s1]

**Table S1:** Volatile compounds in watermelon rind, flesh, and rind-flesh blends (peak area %).

| V#                    | LRI  | Compound                                         | CAS         | 0% Rind  | 10% Rind | 20% Rind | 30% Rind | 100% Rind | <i>p</i> -value |
|-----------------------|------|--------------------------------------------------|-------------|----------|----------|----------|----------|-----------|-----------------|
| <b>Aldehydes (32)</b> |      |                                                  |             |          |          |          |          |           |                 |
| V1                    | 672  | Acetaldehyde                                     | 75-07-0     | 4.41 a   | 3.87 a   | 4.29 a   | 4.35 a   | 16.95 b   | <0.001          |
| V2                    | 794  | Propanal                                         | 123-38-6    | 0.97 c   | 0.76 b   | 0.77 b   | 0.94 bc  | 0.11 a    | <0.001          |
| V3                    | 850  | Butanal                                          | 123-72-8    | -        | -        | 0.09 a   | -        | 1.19 b    | 0.001           |
| V4                    | 882  | 2-Methylbutanal                                  | 96-17-3     | 0.39 c   | 0.28 a   | 0.32 b   | 0.31 ab  | 0.46 d    | <0.001          |
| V5                    | 885  | 3-Methylbutanal                                  | 590-86-3    | 0.24 ab  | 0.21 a   | 0.27 b   | 0.24 ab  | 0.51 c    | <0.001          |
| V6                    | 960  | Pentanal                                         | 110-62-3    | -        | 0.20 a   | 0.21 a   | 0.29 a   | 1.57 b    | <0.001          |
| V7                    | 1031 | ( <i>E</i> )-2-Butenal                           | 4170-30-3   | 0.11 b   | 0.06 a   | 0.13 b   | -        | 2.56 c    | <0.001          |
| V8                    | 1055 | 2-Ethyl-3-methylbutanal                          | 26254-92-2  | 0.01 b   | 0.005 a  | 0.003 a  | -        | -         | 0.011           |
| V9                    | 1075 | Hexanal                                          | 66-25-1     | 11.97 bc | 7.05 a   | 6.86 a   | 9.93 b   | 14.16 c   | <0.001          |
| V10                   | 1121 | ( <i>E</i> )-2-Pentenal                          | 1576-87-0   | 0.06 a   | -        | -        | -        | 0.13 b    | 0.005           |
| V11                   | 1130 | ( <i>E</i> )-3-Hexenal                           | 69112-21-6  | 0.01 a   | 0.01 a   | 0.01 a   | 0.02 a   | 0.09 b    | <0.001          |
| V12                   | 1135 | ( <i>Z</i> )-3-Hexenal                           | 6789-80-6   | 0.02 a   | -        | 0.02 a   | 0.02 a   | 1.36 b    | 0.005           |
| V13                   | 1176 | Heptanal                                         | 111-71-7    | 0.22 b   | 0.16 ab  | 0.13 a   | 0.13 a   | -         | <0.001          |
| V14                   | 1210 | ( <i>E</i> )-2-Hexenal                           | 6728-26-3   | 0.69 bc  | 0.27 a   | 0.41 ab  | 0.48 ab  | 2.17 c    | <0.001          |
| V15                   | 1281 | Octanal                                          | 124-13-0    | 0.31 b   | 0.26 ab  | 0.24 ab  | 0.18 a   | -         | <0.001          |
| V16                   | 1315 | ( <i>E</i> )-2-Heptenal                          | 57266-86-1  | 0.42     | -        | -        | -        | -         | -               |
| V17                   | 1388 | Nonanal                                          | 124-19-6    | 3.57 c   | 3.66 c   | 3.53 c   | 3.00 b   | 1.84 a    | <0.001          |
| V18                   | 1407 | 2-Methyl-3-methylene-cyclopentane carboxaldehyde | 826337-64-8 | -        | -        | -        | -        | 0.27      | -               |
| V19                   | 1422 | ( <i>E</i> )-2-Octenal                           | 2548-87-0   | 0.80 c   | 0.66 b   | 0.44 a   | 0.49 a   | 0.51 a    | <0.001          |
| V20                   | 1435 | ( <i>E</i> )-6-Nonenal                           | 2277-20-5   | 0.16 ab  | 0.23 bc  | 0.25 bc  | 0.30 c   | 0.08 a    | 0.001           |
| V21                   | 1445 | ( <i>Z</i> )-6-Nonenal                           | 2277-19-2   | 3.34 d   | 3.60 e   | 2.85 c   | 2.49 b   | 1.59 a    | <0.001          |
| V22                   | 1493 | Decanal                                          | 112-31-2    | -        | 0.03 a   | 0.03 a   | 0.02 a   | 0.07 a    | 0.179           |
| V23                   | 1499 | ( <i>Z</i> )-2-Nonenal                           | 60784-31-8  | 0.30 a   | 0.28 a   | 0.26 a   | 0.26 a   | 0.24 a    | 0.742           |
| V24                   | 1514 | Benzaldehyde                                     | 100-52-7    | -        | 0.09 a   | 0.09 a   | 0.05 a   | 0.52 b    | <0.001          |
| V25                   | 1531 | ( <i>E</i> )-2-Nonenal                           | 18829-56-6  | 10.09 c  | 8.87 ab  | 8.12 a   | 9.20 bc  | 10.59 d   | <0.001          |
| V26                   | 1567 | ( <i>E,E</i> )-2,6-Nonadienal                    | 17587-33-6  | 0.09 a   | 0.08 a   | 0.07 a   | 0.06 a   | 0.14 a    | 0.106           |
| V27                   | 1581 | ( <i>E,Z</i> )-2,6-Nonadienal                    | 557-48-2    | 7.08 c   | 5.43 b   | 4.61 a   | 5.38 b   | 11.65 d   | <0.001          |
| V28                   | 1636 | Benzeneacetaldehyde                              | 122-78-1    | 0.08 b   | 0.04 a   | 0.04 a   | 0.03 a   | -         | <0.001          |
| V29                   | 1637 | ( <i>E</i> )-2-Decenal                           | 3913-81-3   | -        | 0.03 ab  | 0.04 b   | 0.02 a   | -         | 0.034           |
| V30                   | 1803 | ( <i>E,E</i> )-2,4-Decadienal                    | 25152-84-5  | 0.03 a   | 0.03 a   | 0.01 a   | 0.01 a   | -         | 0.282           |

|                      |      |                            |             |         |         |         |         |         |        |
|----------------------|------|----------------------------|-------------|---------|---------|---------|---------|---------|--------|
| V31                  | 1824 | 4-Oxononanal               | 74327-29-0  | 0.49 c  | 0.27 b  | 0.12 a  | 0.21 ab | 0.12 a  | <0.001 |
| V32                  | 2005 | (E)-Cinnamaldehyde         | 14371-10-9  | 0.01 a  | 0.01 a  | 0.01 a  | 0.01 a  | -       | 0.027  |
| <b>Alcohols (32)</b> |      |                            |             |         |         |         |         |         |        |
| V33                  | 865  | Methanol                   | 67-56-1     | 0.45 a  | 0.61 b  | 0.65 b  | 0.85 c  | -       | <0.001 |
| V34                  | 894  | Isopropyl alcohol          | 67-63-0     | 0.05 a  | 0.05 a  | 0.04 a  | 0.04 a  | 0.23 b  | <0.001 |
| V35                  | 902  | Ethanol                    | 64-17-5     | 6.63 d  | 4.65 a  | 5.53 b  | 6.21 c  | 6.16 c  | <0.001 |
| V36                  | 1136 | Butanol                    | 71-36-3     | 0.07 b  | 0.06 ab | 0.08 b  | 0.04 a  | -       | 0.006  |
| V37                  | 1149 | 2-Methyl-3-pentanol        | 623-37-0    | 0.01 a  | 0.01 a  | -       | -       | -       | 0.372  |
| V38                  | 1152 | 1-Penten-3-ol              | 616-25-1    | 0.41 d  | 0.33 c  | 0.20 a  | 0.27 b  | 0.90 e  | <0.001 |
| V39                  | 1199 | 2-Methylbutanol            | 137-32-6    | 0.27 ab | 0.25 a  | 0.37 b  | 0.26 ab | 2.04 c  | <0.001 |
| V40                  | 1242 | Pentanol                   | 71-41-0     | 0.60 a  | 0.53 a  | 0.51 a  | 0.50 a  | 1.43 b  | <0.001 |
| V41                  | 1314 | (Z)-2-Penten-1-ol          | 1576-95-0   | -       | 0.30 a  | 0.22 a  | 0.23 a  | 0.39 a  | 0.185  |
| V42                  | 1346 | Hexanol                    | 111-27-3    | 3.12 a  | 3.28 a  | 4.36 b  | 3.34 a  | 3.37 a  | <0.001 |
| V43                  | 1356 | (E)-3-Hexen-1-ol           | 928-97-2    | 0.01    | 0.02 b  | 0.02 b  | 0.01 a  | -       | <0.001 |
| V44                  | 1376 | (Z)-3-Hexen-1-ol           | 928-96-1    | 0.29 a  | 0.45 b  | 0.79 d  | 0.57 c  | 0.48 bc | <0.001 |
| V45                  | 1399 | (E)-2-Hexen-1-ol           | 928-95-0    | -       | -       | 0.07    | -       | -       | -      |
| V46                  | 1449 | Heptanol                   | 111-70-6    | 0.04 a  | 0.04 a  | 0.23 b  | 0.20 b  | 0.25 b  | 0.026  |
| V47                  | 1458 | 6-Methylhept-5-en-2-ol     | 1569-60-4   | 1.34 b  | 0.87 a  | 1.41 b  | 1.25 ab | -       | 0.001  |
| V48                  | 1477 | (Z)-3-Hepten-1-ol          | 2108-05-6   | 0.01 a  | 0.05 a  | 0.05 b  | 0.03 ab | -       | 0.011  |
| V49                  | 1485 | 2-Ethylhexanol             | 104-76-7    | 0.21 a  | 0.22 a  | 0.26 a  | 0.20 a  | 0.40 b  | 0.001  |
| V50                  | 1553 | Octanol                    | 111-87-5    | 0.38 a  | 0.45 a  | 0.44 a  | 0.29 a  | 0.77 b  | 0.004  |
| V51                  | 1611 | (E)-2-Octen-1-ol           | 18409-17-1  | 0.40 b  | 0.15 a  | 0.32 b  | 0.10 a  | -       | 0.023  |
| V52                  | 1650 | 2,6-Dimethyl-5-hepten-1-ol | 4234-93-9   | 0.03 a  | 0.01 a  | 0.02 a  | 0.02    | -       | 0.511  |
| V53                  | 1656 | Nonanol                    | 143-08-8    | 0.51 a  | 1.30 c  | 2.18 d  | 0.92 b  | 1.00 b  | <0.001 |
| V54                  | 1680 | (Z)-3-Nonen-1-ol           | 10340-23-5  | 11.22 b | 17.04 c | 19.58 d | 18.84 d | 3.16 a  | <0.001 |
| V55                  | 1694 | 1-Butynyl-1-cyclopentanol  | 155879-96-2 | 0.59 c  | 0.26 a  | 0.48 b  | 0.26 a  | 0.67 c  | <0.001 |
| V56                  | 1709 | (Z)-6-Nonen-1-ol           | 35854-86-5  | 0.58 a  | 1.54 b  | 1.74 b  | 1.03 ab | 0.20 a  | 0.001  |
| V57                  | 1712 | (E)-2-Nonen-1-ol           | 31502-14-4  | 0.26 a  | -       | -       | -       | 0.78 b  | 0.012  |
| V58                  | 1737 | (E,Z)-3,6-Nonadien-1-ol    | 53046-97-2  | 0.03 a  | 0.10 ab | 0.15 bc | 0.07 a  | 0.18 c  | <0.001 |
| V59                  | 1747 | (Z,Z)-3,6-Nonadien-1-ol    | 56805-23-3  | 6.08 b  | 10.00 c | 11.78 d | 10.30 c | 1.91 a  | <0.001 |
| V60                  | 1758 | Decanol                    | 112-30-1    | 0.31 c  | 0.06 a  | 0.13 b  | 0.11 ab | 0.33 c  | <0.001 |
| V61                  | 1764 | (E,Z)-2,6-Nonadien-1-ol    | 7786-44-9   | 0.47 ab | 0.97 c  | 0.87 c  | 0.57 b  | 0.27 a  | <0.001 |
| V62                  | 1859 | 3-Ethyl-3-undecanol        | 62101-31-9  | 0.47 a  | 0.53 a  | 0.50 a  | 0.55 a  | -       | 0.560  |
| V63                  | 1864 | Benzyl alcohol             | 100-51-6    | 0.26 c  | 0.19 b  | 0.18 b  | 0.19 b  | 0.04 a  | <0.001 |
| V64                  | 1895 | Phenylethyl alcohol        | 60-12-8     | 0.02 a  | 0.02 a  | 0.02 a  | 0.01 a  | -       | 0.827  |
| <b>Ketones (18)</b>  |      |                            |             |         |         |         |         |         |        |
| V65                  | 983  | 2-Methyl-3-pentanone       | 565-69-5    | 0.01 a  | 0.01 a  | 0.01 a  | 0.02 a  | -       | 0.396  |
| V66                  | 1013 | 1-Penten-3-one             | 1629-58-9   | 0.17 c  | 0.10 b  | 0.10 b  | 0.12 b  | 0.07 a  | <0.001 |

|     |      |                               |            |         |         |        |         |        |        |
|-----|------|-------------------------------|------------|---------|---------|--------|---------|--------|--------|
| V67 | 1052 | 2,3-Pentanedione              | 600-14-6   | 0.01 b  | 0.005 a | -      | -       | -      | 0.015  |
| V68 | 1123 | 4-Methyl-3-penten-2-one       | 141-79-7   | 0.08 b  | 0.05 a  | 0.13 c | 0.13 c  | -      | 0.009  |
| V69 | 1143 | 3-Heptanone                   | 106-35-4   | 0.02 a  | 0.01 a  | -      | -       | -      | 0.570  |
| V70 | 1246 | 3-Octanone                    | 106-68-3   | 0.30 b  | 0.14 a  | -      | -       | -      | <0.001 |
| V71 | 1276 | 2-Octanone                    | 111-13-7   | 0.05 a  | 0.03 a  | 0.03 a | 0.02 a  | -      | 0.390  |
| V72 | 1303 | 2,2,6-Trimethylcyclohexanone  | 2408-37-9  | 0.02 b  | 0.01 a  | 0.01 a | 0.01 a  | 0.01 a | 0.001  |
| V73 | 1310 | 6-Methyl-6-hepten-2-one       | 10408-15-8 | 0.01 a  | 0.01 a  | 0.01 a | 0.004 a | -      | 0.143  |
| V74 | 1320 | 2,5-Octanedione               | 3214-41-3  | 0.08 ab | 0.06 a  | 0.06 a | 0.09 b  | 0.15 c | <0.001 |
| V75 | 1324 | (Z)-6-Octen-2-one             | 74810-53-0 | 0.03 a  | 0.03 a  | 0.05 a | 0.04 a  | 0.15 b | <0.001 |
| V76 | 1331 | 6-Methyl-5-hepten-2-one       | 110-93-0   | 12.40 d | 11.72 d | 7.30 b | 8.57 c  | 2.24 a | <0.001 |
| V77 | 1381 | 2-Nonanone                    | 821-55-6   | 0.04 b  | 0.01 a  | -      | -       | -      | 0.031  |
| V78 | 1513 | (E,Z)-3,5-Octadien-2-one      | 4173-41-5  | 0.25 c  | 0.11 b  | 0.05   | 0.05 a  | -      | <0.001 |
| V79 | 1563 | (E,E)-3,5-Octadien-2-one      | 30086-02-3 | 0.02 a  | 0.03 a  | -      | -       | -      | 0.644  |
| V80 | 1585 | 6-Methyl-3,5-heptadiene-2-one | 1604-28-0  | 0.06 a  | 0.03 a  | 0.06 a | 0.04 a  | -      | 0.751  |
| V81 | 1593 | 2-Undecanone                  | 112-12-9   | 0.01 a  | 0.01 a  | 0.01 a | 0.01 a  | 0.03 b | 0.048  |
| V82 | 1928 | (Z)-Jasmone                   | 488-10-8   | 0.02 a  | 0.01 a  | 0.01 a | 0.01 a  | -      | 0.168  |

#### Terpenes and terpenoids (20)

|      |      |                                   |            |         |         |         |        |        |        |
|------|------|-----------------------------------|------------|---------|---------|---------|--------|--------|--------|
| V83  | 1146 | $\beta$ -Myrcene                  | 123-35-3   | 0.02 a  | 0.01 a  | 0.02 a  | 0.03 a | -      | 0.324  |
| V84  | 1192 | Eucalyptol                        | 470-82-6   | 0.04 a  | 0.05 a  | 0.04 a  | 0.03 a | 0.15 b | 0.005  |
| V85  | 1427 | Tetrahydrolinalool                | 78-69-3    | -       | 0.003 a | 0.02 ab | 0.01 a | 0.07 b | 0.012  |
| V86  | 1464 | Dihydromyrcenol                   | 18479-58-8 | 0.04 a  | 0.10 a  | 0.07 a  | 0.05 a | 0.11 a | 0.098  |
| V87  | 1474 | Citronellal                       | 106-23-0   | 0.004 a | 0.03 b  | -       | 0.01 a | -      | 0.049  |
| V88  | 1545 | Linalool                          | 78-70-6    | 0.10 a  | 0.16 ab | 0.19 ab | 0.12 a | 0.31 b | 0.037  |
| V89  | 1572 | Isobornyl acetate                 | 125-12-2   | -       | 0.02 a  | 0.04 b  | 0.01 a | 0.10 c | <0.001 |
| V90  | 1633 | Menthol                           | 15356-70-4 | 0.02 a  | 0.02 a  | 0.01 a  | 0.03 a | 0.05 b | 0.001  |
| V91  | 1674 | cis-Citral                        | 106-26-3   | 0.33 c  | 0.41 d  | 0.21 b  | 0.22 b | 0.08 a | <0.001 |
| V92  | 1725 | trans-Citral                      | 141-27-5   | 0.70 b  | 0.89 c  | 0.68 b  | 0.62 b | 0.18 a | <0.001 |
| V93  | 1795 | cis-Geraniol                      | 106-25-2   | 0.03 a  | 0.02 a  | 0.01 a  | 0.01 a | -      | 0.223  |
| V94  | 1839 | trans-Geraniol                    | 106-24-1   | 0.08 a  | 0.08 a  | 0.07 a  | 0.09 a | -      | 0.133  |
| V95  | 1846 | trans-Geranylacetone              | 3796-70-1  | 1.44 d  | 1.24 c  | 0.99 b  | 0.97 b | 0.31 a | <0.001 |
| V96  | 1917 | (E)- $\beta$ -Ionone              | 79-77-6    | 0.07 a  | 0.08 a  | 0.06 a  | 0.06 a | 0.07 a | 0.731  |
| V97  | 1938 | 6,10-Dimethyl-5,9-undecadien-2-ol | 53837-34-6 | 0.01 a  | 0.01 a  | 0.01 a  | 0.01 a | -      | 0.393  |
| V98  | 1964 | $\beta$ -Ionone-5,6-epoxide       | 23267-57-4 | 0.02 a  | 0.02 a  | 0.01 a  | 0.01 a | -      | 0.095  |
| V99  | 2010 | (E,Z)-Pseudoionone                | 13927-47-4 | 0.01 a  | 0.01 a  | 0.01 a  | 0.01 a | -      | 0.930  |
| V100 | 2087 | (E,E)-Pseudoionone                | 3548-78-5  | 0.02 b  | 0.02 b  | 0.01 a  | 0.01 a | -      | 0.002  |
| V101 | 2241 | Dihydroactinidiolide              | 15356-74-8 | 0.01 b  | 0.005 a | 0.004 a | 0.01 b | -      | 0.009  |
| V102 | 2273 | Farnesyl acetone                  | 1117-52-8  | 0.01 a  | 0.01 a  | 0.01 a  | 0.01 a | -      | 0.484  |

#### Esters and lactones (9)

|                     |      |                                    |            |         |         |          |         |        |        |
|---------------------|------|------------------------------------|------------|---------|---------|----------|---------|--------|--------|
| V103                | 858  | Ethyl acetate                      | 141-78-6   | 0.10 ab | -       | 0.04 a   | -       | 0.18 b | <0.001 |
| V104                | 1165 | Pentyl acetate                     | 628-63-7   | 0.01 a  | 0.01 a  | 0.01 a   | 0.01 a  | -      | 0.194  |
| V105                | 1265 | Hexyl acetate                      | 142-92-7   | 0.01 a  | 0.01 a  | 0.01 a   | 0.01 a  | -      | 0.052  |
| V106                | 1601 | (Z)-3-Nonenyl acetate              | 13049-88-2 | -       | -       | 0.02 a   | 0.02 a  | -      | 0.485  |
| V107                | 2020 | Methyl 9-oxo-nonanoate             | 1931-63-1  | 0.01 a  | 0.01 a  | 0.005 a  | 0.01 a  | -      | 0.711  |
| V108                | 2156 | Methyl hexadecanoate               | 112-39-0   | 0.004 a | 0.01 a  | 0.01 a   | 0.01 a  | 0.03 b | 0.001  |
| V109                | 2362 | Methyl (Z,Z)-9,12-octadecadienoate | 112-63-0   | -       | -       | 0.004 a  | 0.005 a | 0.02 b | 0.002  |
| V110                | 1996 | $\gamma$ -Nonalactone              | 104-61-0   | 0.04 a  | 0.03 a  | 0.03 a   | 0.03 a  | 0.08 b | <0.001 |
| V111                | 2103 | cis-Jasmone lactone                | 70851-61-5 | 0.01 a  | 0.002 a | 0.003 a  | 0.01 a  | -      | 0.329  |
| <b>Acids (5)</b>    |      |                                    |            |         |         |          |         |        |        |
| V112                | 1851 | Hexanoic acid                      | 142-62-1   | 0.13 a  | 0.10 a  | 0.14 a   | 0.15 a  | -      | 0.449  |
| V113                | 1942 | 2-Ethylhexanoic acid               | 149-57-5   | 0.01 a  | 0.01 a  | 0.02 a   | 0.01 a  | -      | 0.732  |
| V114                | 1947 | Heptanoic acid                     | 112-05-0   | 0.03 a  | 0.03 a  | 0.04 a   | 0.04 a  | 0.05 a | 0.608  |
| V115                | 2039 | Octanoic acid                      | 124-07-2   | 0.02 a  | 0.02 a  | 0.04 a   | 0.04 a  | 0.02 a | 0.158  |
| V116                | 2127 | Nonanoic acid                      | 112-05-0   | 0.01 a  | 0.01 a  | 0.02 ab  | 0.03 ab | 0.04 b | 0.044  |
| <b>Sulfides (3)</b> |      |                                    |            |         |         |          |         |        |        |
| V117                | 648  | Methanethiol                       | 74-93-1    | 0.50 a  | 0.46 a  | 0.39 a   | 0.53 a  | 0.18 a | 0.157  |
| V118                | 1061 | Dimethyl disulfide                 | 624-92-0   | 0.02 a  | 0.02 a  | 0.02 a   | 0.02 a  | 0.32 b | <0.001 |
| V119                | 1367 | Dimethyl trisulfide                | 3658-80-8  | -       | -       | -        | 0.01 a  | 0.17 b | 0.001  |
| <b>Others (7)</b>   |      |                                    |            |         |         |          |         |        |        |
| V120                | 928  | 2-Ethylfuran                       | 3208-16-0  | 0.02 a  | 0.02 b  | 0.01 a   | 0.03 b  | 0.01 a | <0.001 |
| V121                | 1223 | 2-Pentylfuran                      | 3777-69-3  | 1.07 bc | 2.11 d  | 1.05 b   | 1.40 c  | 0.55 a | <0.001 |
| V122                | 1294 | (E)-2-pentenylfuran                | 70424-14-5 | 0.42 c  | 0.66 d  | 0.28 b   | 0.47 c  | 0.16 a | <0.001 |
| V123                | 1413 | 3-(4-Methyl-3-pentenyl)-furan      | 539-52-6   | 0.09 bc | 0.11 c  | 0.08 abc | 0.06 ab | 0.04 a | 0.001  |
| V124                | 1113 | Ethylbenzene                       | 100-41-4   | 0.02 a  | 0.02 ab | 0.02 ab  | 0.01 a  | 0.03 b | 0.017  |
| V125                | 1170 | o-Xylene                           | 95-47-6    | 0.03 ab | 0.02 a  | 0.05 b   | 0.03 ab | -      | 0.001  |
| V126                | 1728 | Naphthalene                        | 91-20-3    | -       | -       | -        | -       | 0.22   | -      |

Different letters within each row indicate significant differences of each volatile compound among five samples according to one-way ANOVA and Tukey's HSD test ( $\alpha \leq 0.05$ ). LRI = linear retention index; "-" = not detected.
